# Supplementary material for: Single and Combined Associations of Plasma and Urine Essential Trace Elements (Zn, Cu, Se, and Mn) with Cardiovascular Risk Factors in a Mediterranean Population
Source: MDPI journal article supplement (doi:10.3390/antiox11101991), 2022-10-07
Supplement: s1 [file s1]

# Single and combined associations of plasma and urine essential trace elements (Zn, Cu, Se and Mn) with cardiovascular risk factors in a Mediterranean population

Rocío Barragán, Cristina Sánchez-González, Pilar Aranda, José V. Sorlí, Eva M Asensio, Olga Portolés, Carolina Ortega-Azorín, Laura V Villamil, Oscar Coltell, Juan Llopis, Lorenzo Rivas-García, and Dolores Corella

## SUPPLEMENTARY MATERIAL

### INDEX

|                                                                                                                                                                                                         |   |
|---------------------------------------------------------------------------------------------------------------------------------------------------------------------------------------------------------|---|
| <b>Table S1.</b> Spearman correlation coefficients and p-values between plasma and urine concentrations of essential elements (Zn, Cu, Se and Mn) in a general Mediterranean population (n= 484). ..... | 2 |
| <b>Table S2.</b> Single association between plasma levels of trace elements and cardiovascular risk factors (as categories). ..                                                                         | 3 |
| <b>Table S3.</b> Single association between urine levels of trace elements and cardiovascular risk factors (as categories). .....                                                                       | 4 |
| <b>Table S4.</b> Tertiles for urine concentrations of Zn, Cu, Se and Mn in the studied population. ....                                                                                                 | 5 |
| <b>Table S5.</b> Combined association between urine levels of trace elements (Zn, Cu, Se and Mn) and cardiovascular risk factors (as continuous). Trace elements risk score (TERS) approach. ....       | 5 |

---

**Table S1.** Spearman correlation coefficients and p-values between plasma and urine concentrations of essential elements (Zn, Cu, Se and Mn) in a general Mediterranean population (n= 484).

| Essential element | Coefficients | Zn plasma       | Cu plasma       | Se plasma       | Mn plasma       | Zn urine        | Cu urine        | Se urine       | Mn urine |
|-------------------|--------------|-----------------|-----------------|-----------------|-----------------|-----------------|-----------------|----------------|----------|
| Zn plasma         | r<br>p       | 1               |                 |                 |                 |                 |                 |                |          |
| Cu plasma         | r<br>p       | -0.054<br>0.237 | 1               |                 |                 |                 |                 |                |          |
| Se plasma         | r<br>p       | 0.310<br><0.001 | 0.057<br>0.209  | 1               |                 |                 |                 |                |          |
| Mn plasma         | r<br>p       | 0.051<br>0.266  | 0.024<br>0.604  | -0.119<br>0.009 | 1               |                 |                 |                |          |
| Zn urine          | r<br>p       | 0.233<br><0.001 | -0.107<br>0.018 | 0.02<br>0.657   | -0.029<br>0.523 | 1               |                 |                |          |
| Cu urine          | r<br>p       | 0.037<br>0.416  | 0.089<br>0.052  | -0.082<br>0.073 | 0.012<br>0.794  | 0.601<br><0.001 | 1               |                |          |
| Se urine          | r<br>p       | 0.005<br>0.917  | -0.062<br>0.172 | 0.082<br>0.071  | 0.025<br>0.586  | 0.503<br><0.001 | 0.722<br><0.001 | 1              |          |
| Mn urine          | r<br>p       | 0.152<br>0.001  | -0.005<br>0.910 | 0.100<br>0.033  | -0.141<br>0.003 | 0.011<br>0.814  | -0.059<br>0.221 | 0.004<br>0.927 | 1        |

Correlation coefficient (r: Spearman rho) in the whole population.

**Table S2.** Single association between plasma levels of trace elements and cardiovascular risk factors (as categories).

| Predictor                   | Zn         | <i>p</i> <sup>1</sup> | <i>p</i> <sup>2</sup> | <i>p</i> <sup>3</sup> | Cu         | <i>p</i> <sup>1</sup> | <i>p</i> <sup>2</sup> | <i>p</i> <sup>3</sup> | Se        | <i>p</i> <sup>1</sup> | <i>p</i> <sup>2</sup> | <i>p</i> <sup>3</sup> | Mn          | <i>p</i> <sup>1</sup> | <i>p</i> <sup>2</sup> | <i>p</i> <sup>3</sup> |
|-----------------------------|------------|-----------------------|-----------------------|-----------------------|------------|-----------------------|-----------------------|-----------------------|-----------|-----------------------|-----------------------|-----------------------|-------------|-----------------------|-----------------------|-----------------------|
| <b>Sex</b>                  |            |                       |                       |                       |            |                       |                       |                       |           |                       |                       |                       |             |                       |                       |                       |
| Men                         | 16.64±3.49 | 0.010                 | <0.001                | <0.001                | 21.89±4.23 | <0.001                | <0.001                | <0.001                | 1.21±0.21 | 0.089                 | 0.063                 | 0.132                 | 73.68±40.48 | 0.631                 | 0.353                 | 0.161                 |
| Women                       | 15.58±3.38 |                       |                       |                       | 27.44±6.95 |                       |                       |                       | 1.18±0.19 |                       |                       |                       | 75.45±37.37 |                       |                       |                       |
| <b>Age</b>                  |            |                       |                       |                       |            |                       |                       |                       |           |                       |                       |                       |             |                       |                       |                       |
| 18-42 years                 | 16.31±3.33 |                       |                       |                       | 26.13±8.86 |                       |                       |                       | 1.17±0.19 |                       |                       |                       | 82.70±37.63 |                       |                       |                       |
| 43-54 years                 | 15.57±2.88 | 0.090                 | 0.236                 | 0.318                 | 25.78±5.30 | 0.858                 | 0.895                 | 0.456                 | 1.20±0.18 | 0.064                 | 0.003                 | 0.004                 | 68.08±37.10 | 0.005                 | 0.006                 | 0.001                 |
| 55-80 years                 | 16.18±3.86 |                       |                       |                       | 25.33±6.54 |                       |                       |                       | 1.21±0.16 |                       |                       |                       | 77.26±39.08 |                       |                       |                       |
| <b>Hypercholesterolemia</b> |            |                       |                       |                       |            |                       |                       |                       |           |                       |                       |                       |             |                       |                       |                       |
| LDL-c ≥160 mg/dL            | 15.85±2.84 |                       |                       |                       | 25.44±5.78 |                       |                       |                       | 1.21±0.18 |                       |                       |                       | 72.12±38.89 |                       |                       |                       |
| LDL-c <160 mg/dL            | 16.02±4.27 | 0.84                  | 0.030                 | 0.104                 | 25.79±8.13 | 0.582                 | 0.186                 | 0.505                 | 1.15±0.19 | <0.001                | <0.001                | <0.001                | 79.78±37.13 | 0.593                 | 0.410                 | 0.965                 |
| <b>Diabetes</b>             |            |                       |                       |                       |            |                       |                       |                       |           |                       |                       |                       |             |                       |                       |                       |
| Diabetic                    | 15.18±2.99 |                       |                       |                       | 23.86±5.31 |                       |                       |                       | 1.17±0.23 |                       |                       |                       | 77.58±40.40 |                       |                       |                       |
| Non-diabetic                | 16.05±3.46 | 0.113                 | 0.075                 | 0.282                 | 25.67±6.81 | 0.301                 | 0.903                 | 0.484                 | 1.19±0.19 | 0.905                 | 0.509                 | 0.470                 | 75.78±38.25 | 0.776                 | 0.357                 | 0.394                 |
| <b>Hypertension</b>         |            |                       |                       |                       |            |                       |                       |                       |           |                       |                       |                       |             |                       |                       |                       |
| Yes HBP                     | 16.05±2.87 |                       |                       |                       | 25.12±5.72 |                       |                       |                       | 1.20±0.21 |                       |                       |                       | 73.50±38.13 |                       |                       |                       |
| No HBP                      | 15.92±3.70 | 0.762                 | 0.840                 | 0.687                 | 25.77±7.12 | 0.426                 | 0.050                 | 0.279                 | 1.18±0.19 | 0.304                 | 0.515                 | 0.647                 | 76.74±30.02 | 0.507                 | 0.529                 | 0.609                 |
| <b>Waist circumference</b>  |            |                       |                       |                       |            |                       |                       |                       |           |                       |                       |                       |             |                       |                       |                       |
| No risk                     | 5.44±4.54  | 0.790                 | 0.821                 | 0.167                 | 0.12±0.07  | 0.073                 | 0.022                 | 0.498                 | 0.33±0.18 | 0.908                 | 0.114                 | 0.485                 | 7.93±6.39   | 0.169                 | 0.728                 | 0.927                 |
| Risk                        | 5.69±3.94  |                       |                       |                       | 0.13±0.08  |                       |                       |                       | 0.41±0.22 |                       |                       |                       | 7.20±6.11   |                       |                       |                       |

Values are mean±standard error (SE); Zn: Zinc. Cu: Copper. Se: Selenium. Mn: Manganese; Units are expressed as μmol/L for Zn, Cu and Se, and nmol/L for Mn; <sup>1</sup>: Unadjusted model. <sup>2</sup>: Model adjusted for sex and age. <sup>3</sup>: Model adjusted for sex, age, obesity and medications. LDL-c: LDL-cholesterol. HBP: High blood pressure.

**Table S3.** Single association between urine levels of trace elements and cardiovascular risk factors (as categories).

| Predictor                   | Zn        | <i>p</i> <sup>1</sup> | <i>p</i> <sup>2</sup> | <i>p</i> <sup>3</sup> | Cu        | <i>p</i> <sup>1</sup> | <i>p</i> <sup>2</sup> | <i>p</i> <sup>3</sup> | Se        | <i>p</i> <sup>1</sup> | <i>p</i> <sup>2</sup> | <i>p</i> <sup>3</sup> | Mn          | <i>p</i> <sup>1</sup> | <i>p</i> <sup>2</sup> | <i>p</i> <sup>3</sup> |
|-----------------------------|-----------|-----------------------|-----------------------|-----------------------|-----------|-----------------------|-----------------------|-----------------------|-----------|-----------------------|-----------------------|-----------------------|-------------|-----------------------|-----------------------|-----------------------|
| <b>Sex</b>                  |           |                       |                       |                       |           |                       |                       |                       |           |                       |                       |                       |             |                       |                       |                       |
| Men                         | 7.07±4.82 | <0.001                | <0.001                | <0.001                | 0.14±0.07 | 0.04                  | 0.006                 | 0.003                 | 0.42±0.22 | 0.010                 | <0.001                | <0.001                | 7.38±3.62   | 0.393                 | 0.393                 | 0.382                 |
| Women                       | 4.87±3.74 |                       |                       |                       | 0.12±0.07 |                       |                       |                       | 0.35±0.20 |                       |                       |                       | 7.79±7.27   |                       |                       |                       |
| <b>Age</b>                  |           |                       |                       |                       |           |                       |                       |                       |           |                       |                       |                       |             |                       |                       |                       |
| 18-42 years                 | 6.82±5.14 |                       |                       |                       | 0.15±0.08 |                       |                       |                       | 0.46±0.22 |                       |                       |                       | 6.67±4.19   |                       |                       |                       |
| 43-54 years                 | 5.15±3.55 | <0.001                | 0.001                 | 0.012                 | 0.11±0.06 | <0.001                | <0.001                | <0.001                | 0.35±0.19 | <0.001                | <0.001                | <0.001                | 8.08±8.04   | 0.055                 | 0.229                 | 0.490                 |
| 55-80 years                 | 4.63±3.45 |                       |                       |                       | 0.11±0.06 |                       |                       |                       | 0.28±0.16 |                       |                       |                       | 7.87±5.59   |                       |                       |                       |
| <b>Hypercholesterolemia</b> |           |                       |                       |                       |           |                       |                       |                       |           |                       |                       |                       |             |                       |                       |                       |
| LDL-c ≥160 mg/dL            | 5.66±4.35 | 0.717                 | 0.251                 | 0.106                 | 0.12±0.07 | 0.007                 | 0.805                 | 0.747                 | 0.36±0.21 | <0.001                | 0.231                 | 0.862                 | 7.83±5.40   | 0.217                 | 0.749                 | 0.644                 |
| LDL-c <160 mg/dL            | 5.50±4.09 |                       |                       |                       | 0.13±0.07 |                       |                       |                       | 0.39±0.21 |                       |                       |                       | 7.74±7.72   |                       |                       |                       |
| <b>Diabetes</b>             |           |                       |                       |                       |           |                       |                       |                       |           |                       |                       |                       |             |                       |                       |                       |
| Diabetic                    | 7.47±3.64 | <0.001                | 0.001                 | 0.036                 | 0.14±0.08 | 0.534                 | 0.107                 | 0.175                 | 0.32±0.18 | 0.175                 | 0.733                 | 0.682                 | 10.14±12.63 | 0.128                 | 0.274                 | 0.141                 |
| Non-diabetic                | 5.52±4.27 |                       |                       |                       | 0.13±0.08 |                       |                       |                       | 0.37±0.21 |                       |                       |                       | 7.25±5.22   |                       |                       |                       |
| <b>Hypertension</b>         |           |                       |                       |                       |           |                       |                       |                       |           |                       |                       |                       |             |                       |                       |                       |
| Yes HBP                     | 5.50±3.68 | 0.781                 | 0.793                 | 0.399                 | 0.12±0.05 | 0.105                 | 0.783                 | 0.949                 | 0.32±0.18 | 0.002                 | 0.085                 | 0.605                 | 8.22±6.24   | 0.121                 | 0.583                 | 0.799                 |
| No HBP                      | 5.56±4.43 |                       |                       |                       | 0.13±0.07 |                       |                       |                       | 0.39±0.21 |                       |                       |                       | 7.25±6.20   |                       |                       |                       |
| <b>Waist circumference</b>  |           |                       |                       |                       |           |                       |                       |                       |           |                       |                       |                       |             |                       |                       |                       |
| No risk                     | 5.44±4.54 | 0.696                 | 0.225                 |                       | 0.12±0.07 | 0.039                 | 0.856                 |                       | 0.33±0.18 | <0.001                | 0.068                 |                       | 7.93±6.39   | 0.280                 |                       | 0.976                 |
| Risk                        | 5.69±3.94 |                       |                       |                       | 0.13±0.08 |                       |                       |                       | 0.41±0.22 |                       |                       |                       | 7.20±6.11   |                       |                       |                       |

Values are mean±standard error (SE). Zn: Zinc. Cu: Copper. Se: Selenium. Mn: Manganese; Units are expressed as μmol/L for Zn, Cu and Se, and nmol/L for Mn; <sup>1</sup>: Unadjusted model. <sup>2</sup>: Model adjusted for sex and age. <sup>3</sup>: Model adjusted for sex, age, obesity and medications. LDL-c: LDL-cholesterol. HBP: High blood pressure.

**Table S4.** Tertiles for urine concentrations of Zn, Cu, Se and Mn in the studied population.

|             | <b>T1 urine</b> | <b>T2 urine</b> | <b>T3 urine</b> |
|-------------|-----------------|-----------------|-----------------|
| Zn (μmol/L) | Lower to 3.27   | 3.28 to 6.13    | 6.13 to higher  |
| Cu (μmol/L) | Lower to 0.089  | 0.09 to 0.14    | 0.15 to higher  |
| Se (μmol/L) | Lower to 0.25   | 0.25 to 0.43    | 0.44 to higher  |
| Mn (nmol/L) | Lower to 6.37   | 6.38 to 8.19    | 8.20 to higher  |

T1: Tertile 1; T2: Tertile 2; T3: Tertile 3.

**Table S5.** Combined association between urine levels of trace elements (Zn, Cu, Se and Mn) and cardiovascular risk factors (as continuous). Trace elements risk score (TERS) approach.

|                           | <b>TERS urine</b>        |                          |                          |
|---------------------------|--------------------------|--------------------------|--------------------------|
|                           | <b>Model 1</b>           | <b>Model 2</b>           | <b>Model 3</b>           |
| <b>Variable</b>           | r (p-value) <sup>1</sup> | r (p-value) <sup>2</sup> | r (p-value) <sup>3</sup> |
| Total-cholesterol (mg/dL) | 0.039 (0.393)            | 0.043 (0.347)            | 0.052 (0.267)            |
| LDL-cholesterol (mg/dl)   | 0.069 (0.127)            | 0.063 (0.167)            | 0.074 (0.116)            |
| HDL-cholesterol (mg/dL)   | -0.183 (<0.001)          | -0.157 (0.001)           | -0.154 (0.001)           |
| Triglycerides (mg/dL)     | 0.180 (<0.001)           | 0.191 (<0.001)           | 0.190 (<0.001)           |
| SBP (mmHg)                | 0.154 (0.001)            | 0.111 (0.018)            | 0.082 (0.082)            |
| DBP (mmHg)                | 0.108 (0.018)            | 0.085 (0.069)            | 0.060 (0.201)            |
| Glucose (mg/dL)           | 0.139 (0.002)            | 0.216 (<0.001)           | 0.172 (<0.001)           |
| BMI (kg/m <sup>2</sup> )  | 0.119 (0.009)            | 0.080 (0.087)            | —                        |
| Waist Circumference (cm)  | 0.154 (0.001)            | 0.079 (0.094)            | —                        |

Values are correlation coefficients (r) and p-values; <sup>1</sup>: unadjusted p value; <sup>2</sup>: p value adjusted by sex and age; <sup>3</sup>: p value adjusted by sex, age, obesity and medication when appropriate. r: Pearson; SBP: systolic blood pressure; DBP: diastolic blood pressure; BMI: Body Mass Index; In the combined TERS analysis, urine tertiles of Zn, Cu, Se and Mn were considered and scored (as 0, 1 or 2) for the additive score taking into account the direct or inverse risk effect: Zn, Cu and Mn were scored directly, and Se was scored inversely.
